# Supplementary figures and images for: Lens Epithelial Explants Treated with Vitreous Humor Undergo Alterations in Chromatin Landscape with Concurrent Activation of Genes Associated with Fiber Cell Differentiation and Innate Immune Response
Source: MDPI journal article supplement (doi:10.3390/cells12030501), 2023-02-03

A.

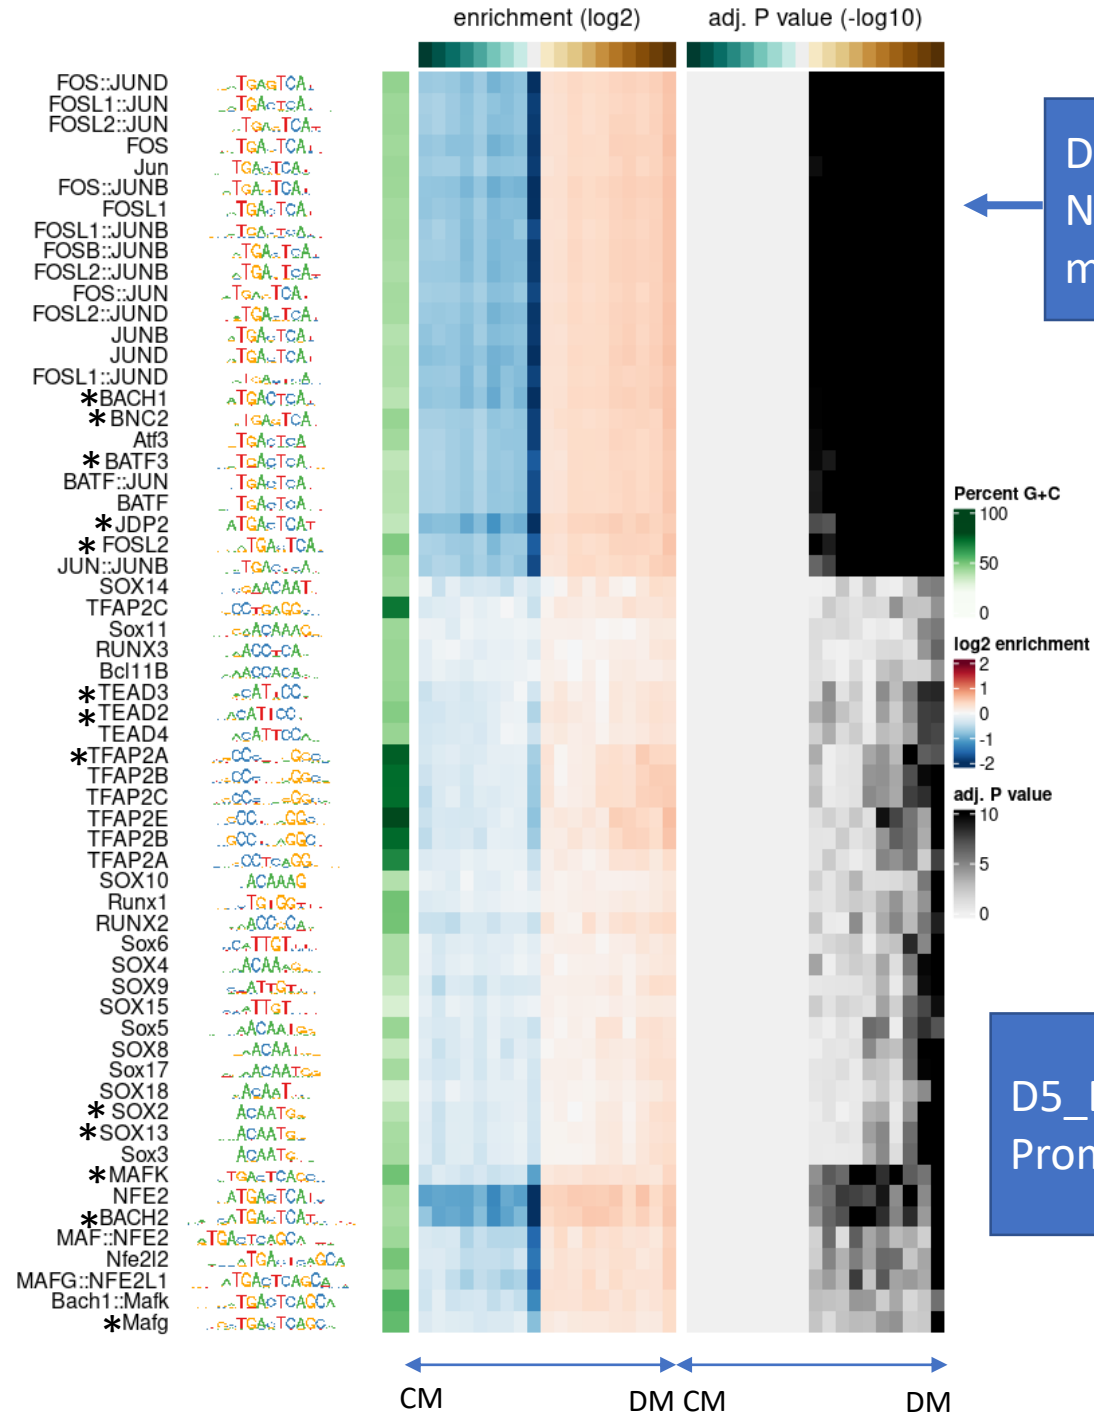

B.

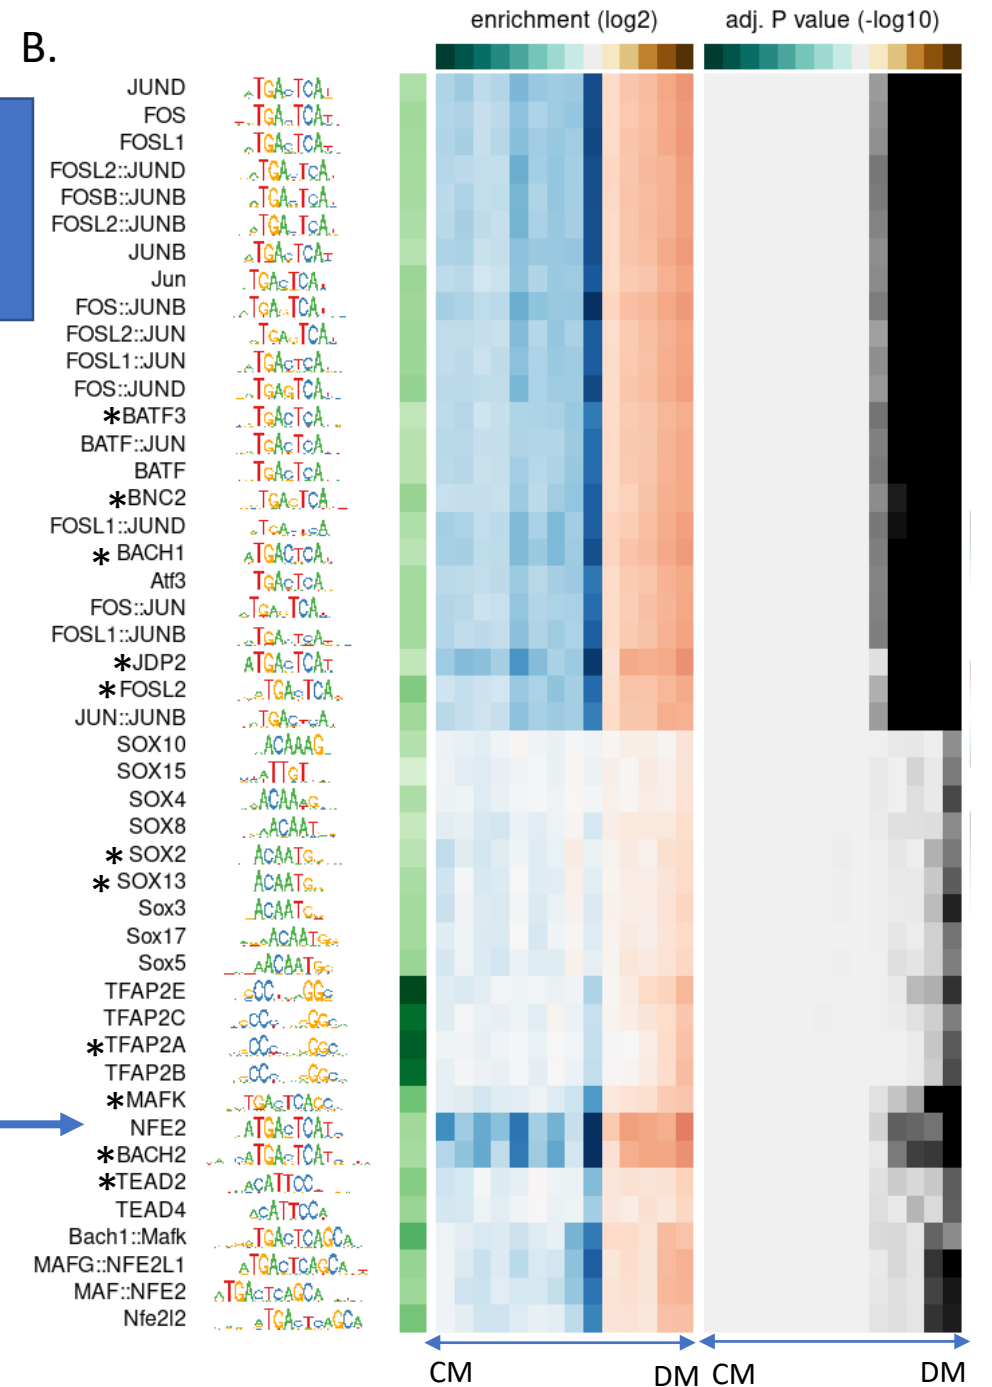

Supplement: s1 [file s1]

A.

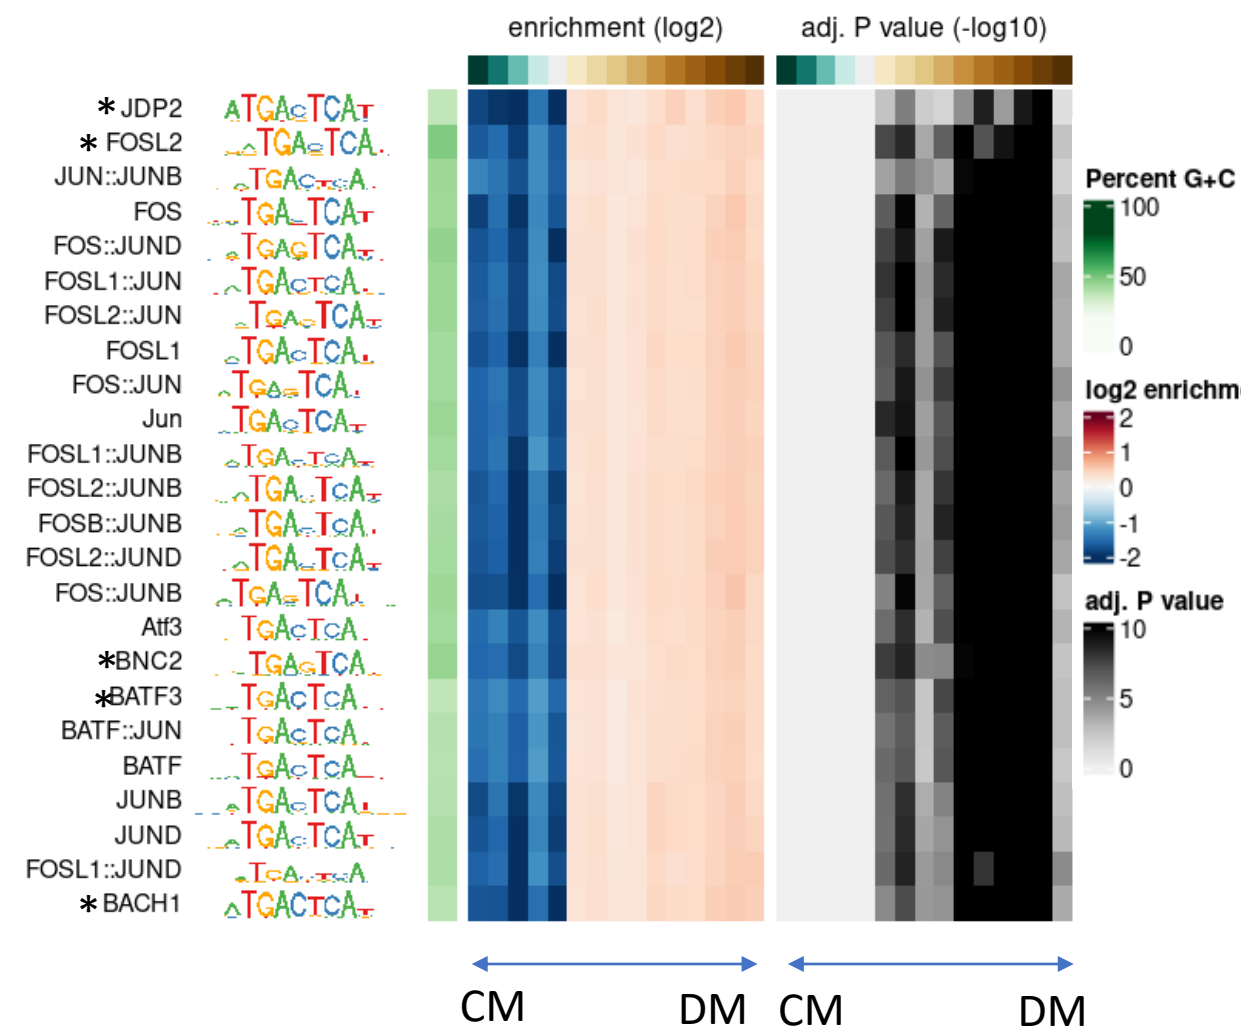

D1\_DM\_Non-promoter motif

B.

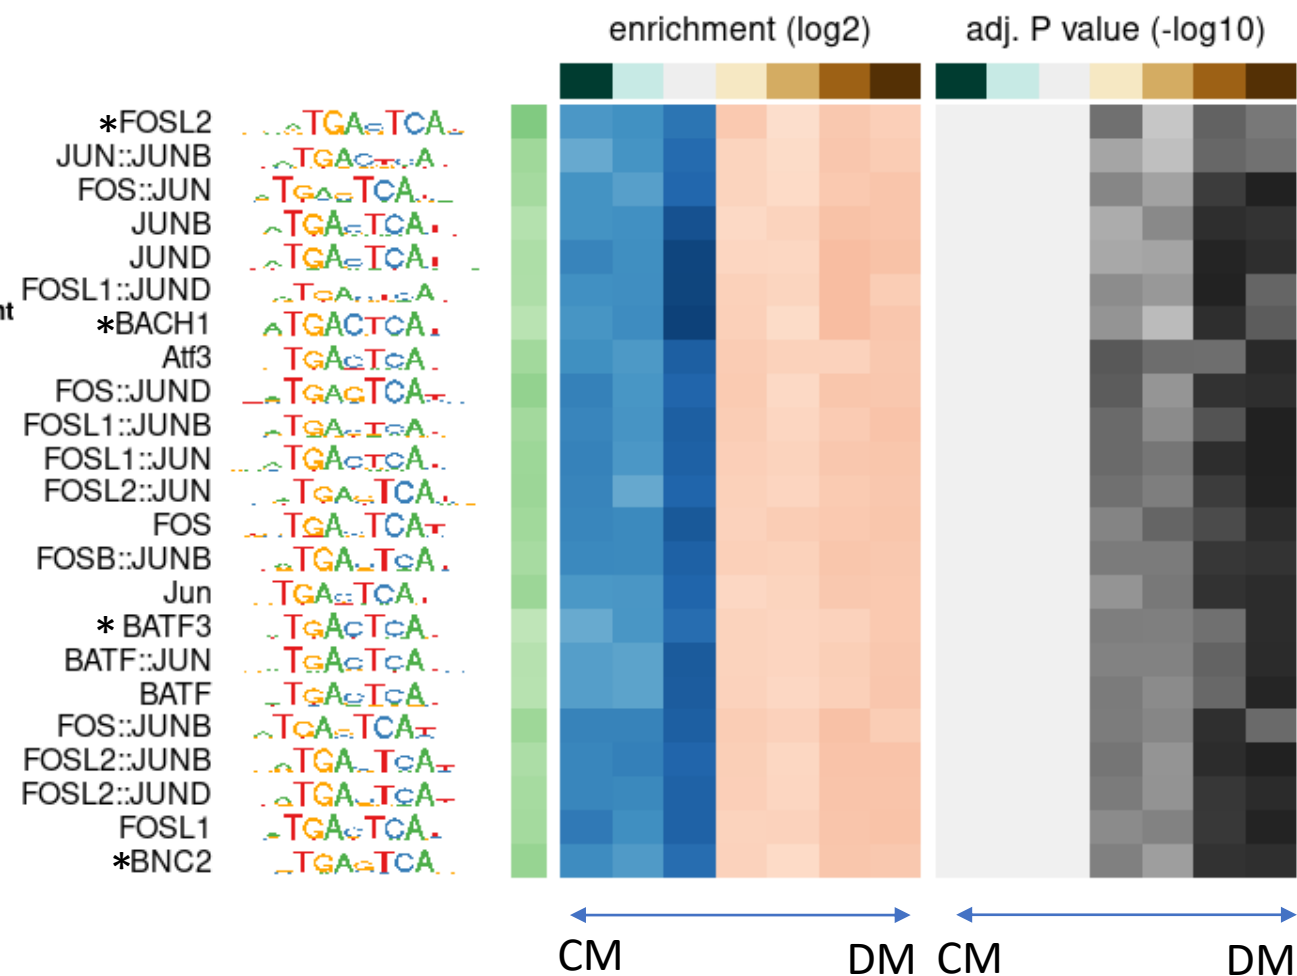

D1\_DM\_Promoter motif

Supplement: s1 [file s1]

A.

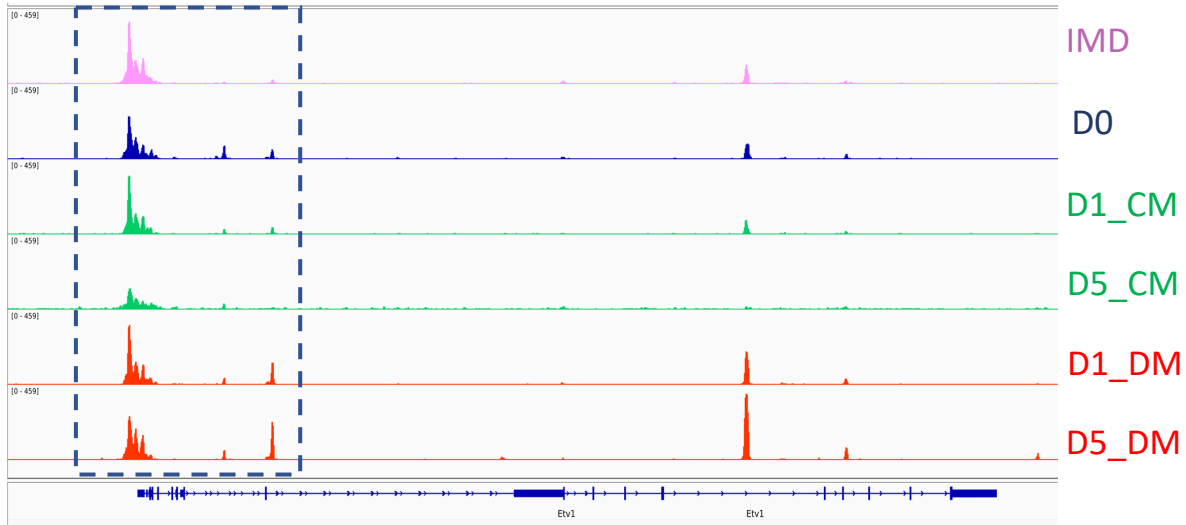

*Etv1*

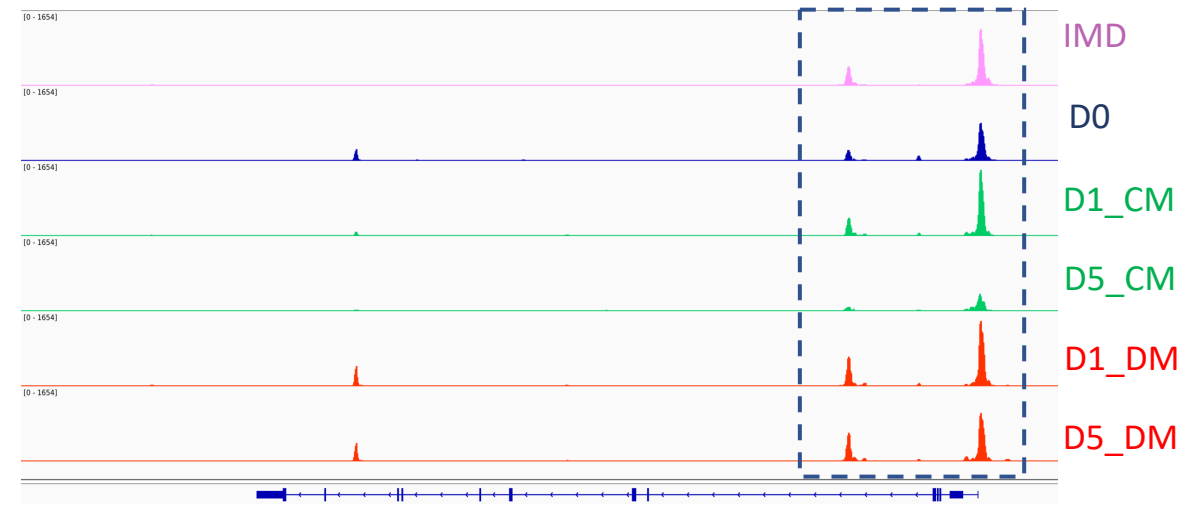

*Etv5*

B.

### MAPK Signaling Genes

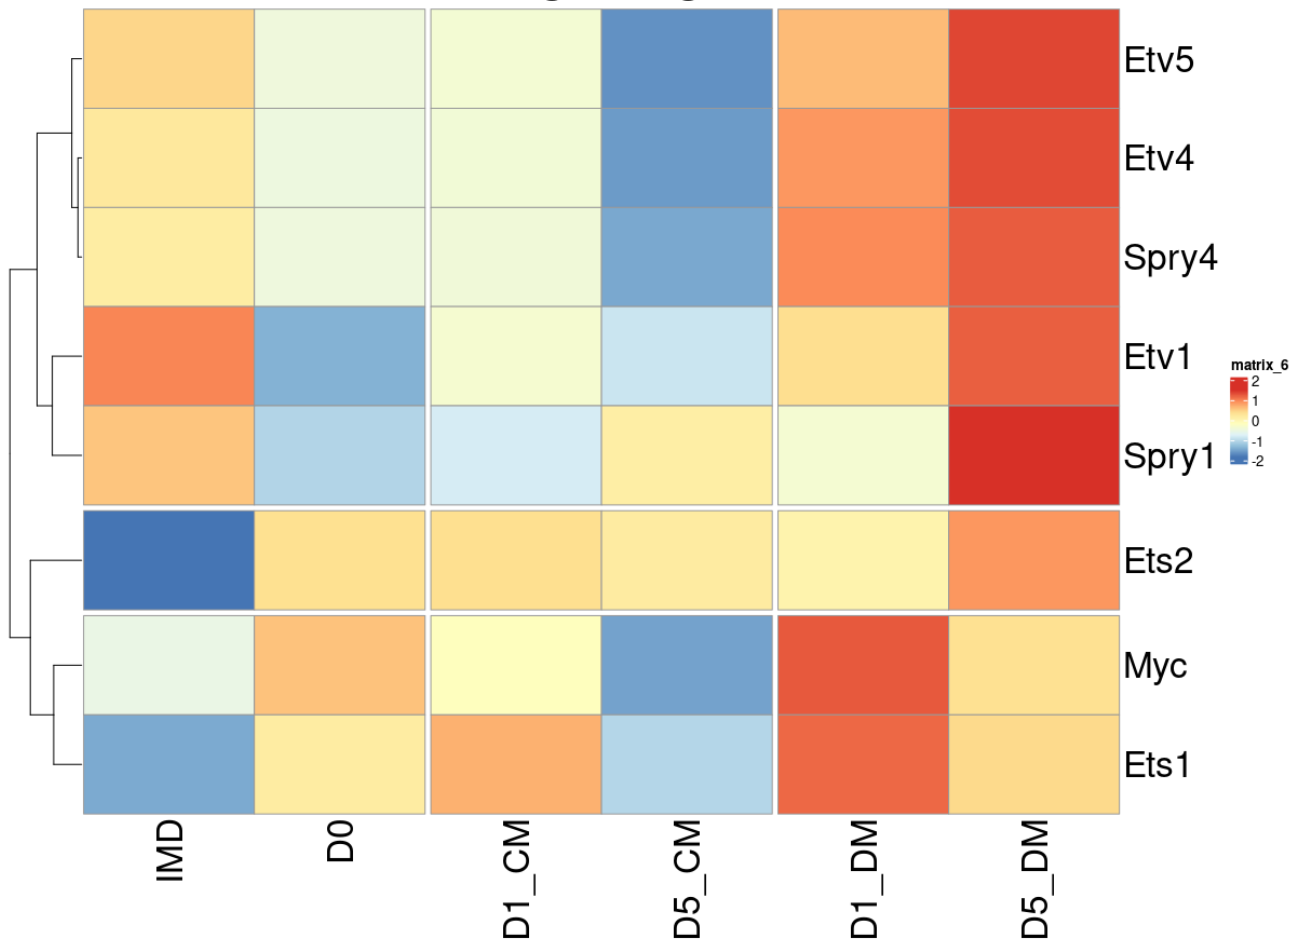

Supplement: s1 [file s1]

**D5\_DM\_Promoter**

**D1\_DM\_Non-Promot**

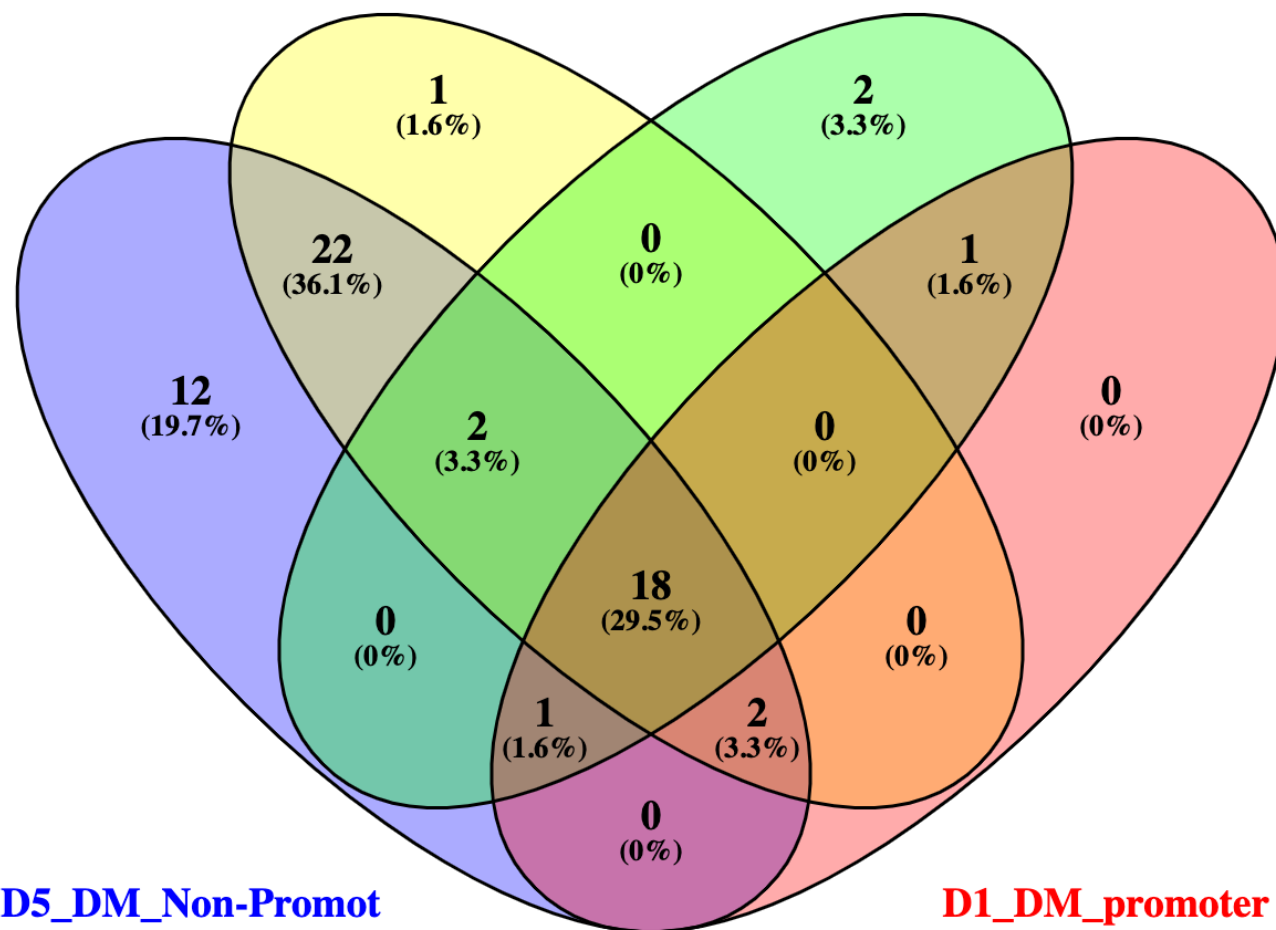

**D5\_DM\_Non-Promot**

**D1\_DM\_promoter**

Supplement: s1 [file s1]

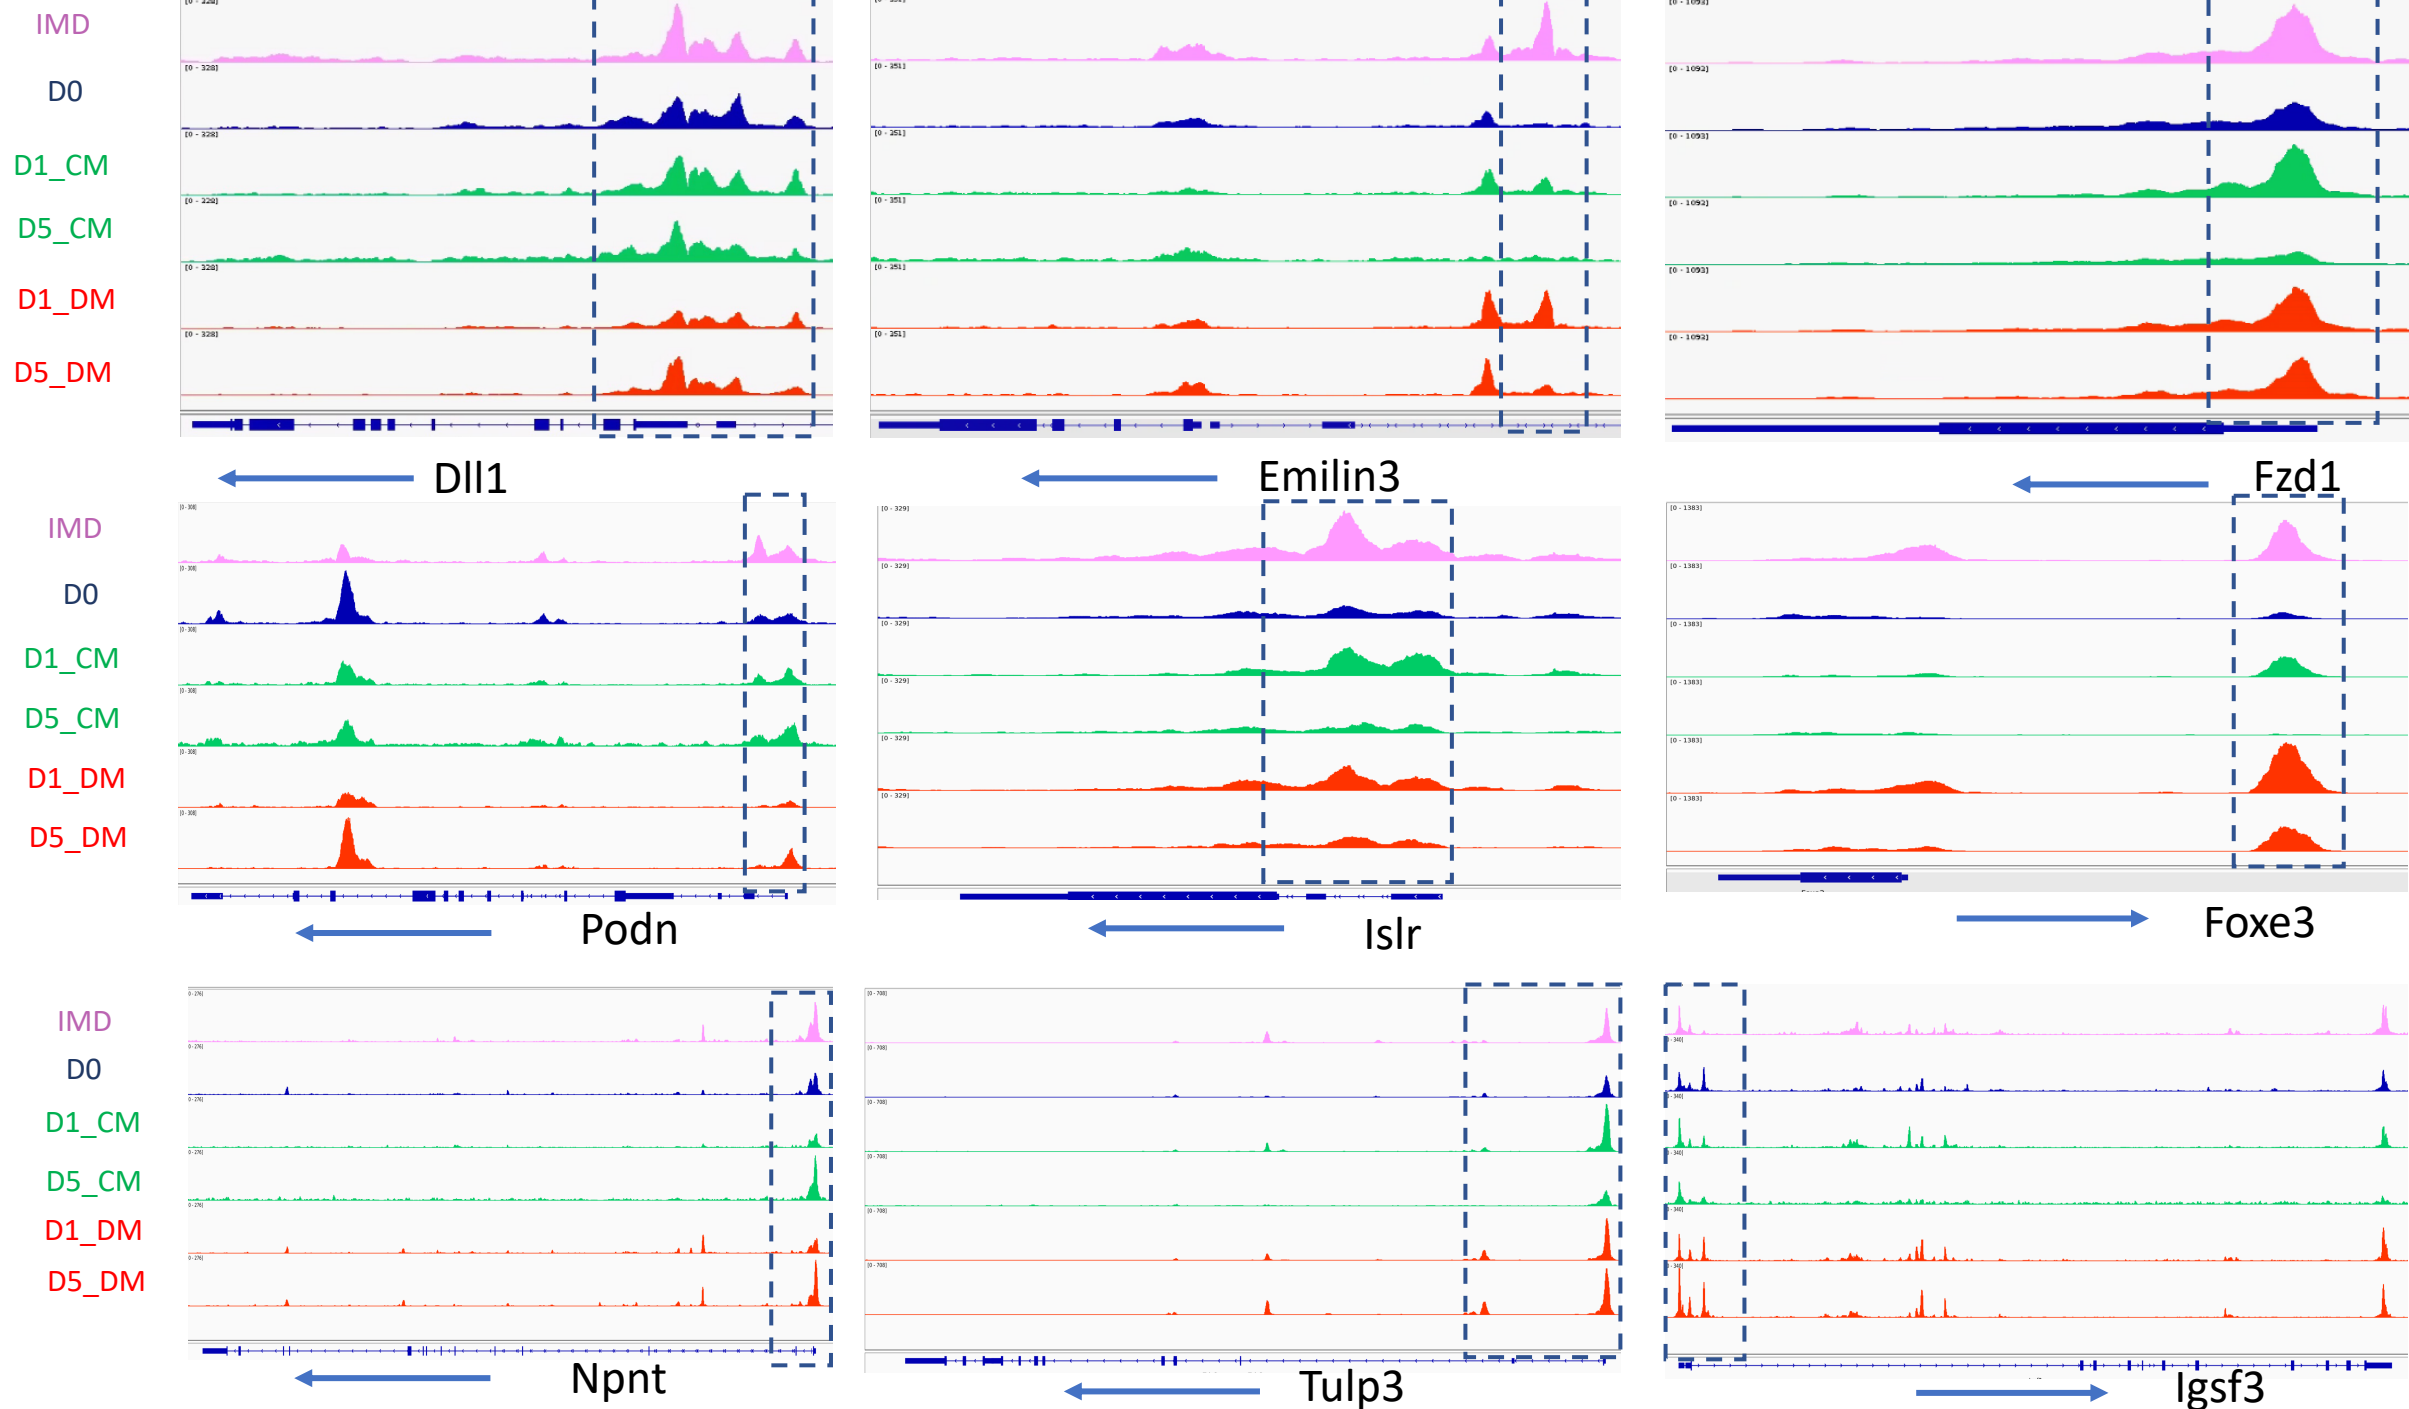

Supplement: s1 [file s1]

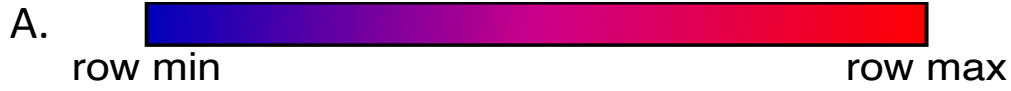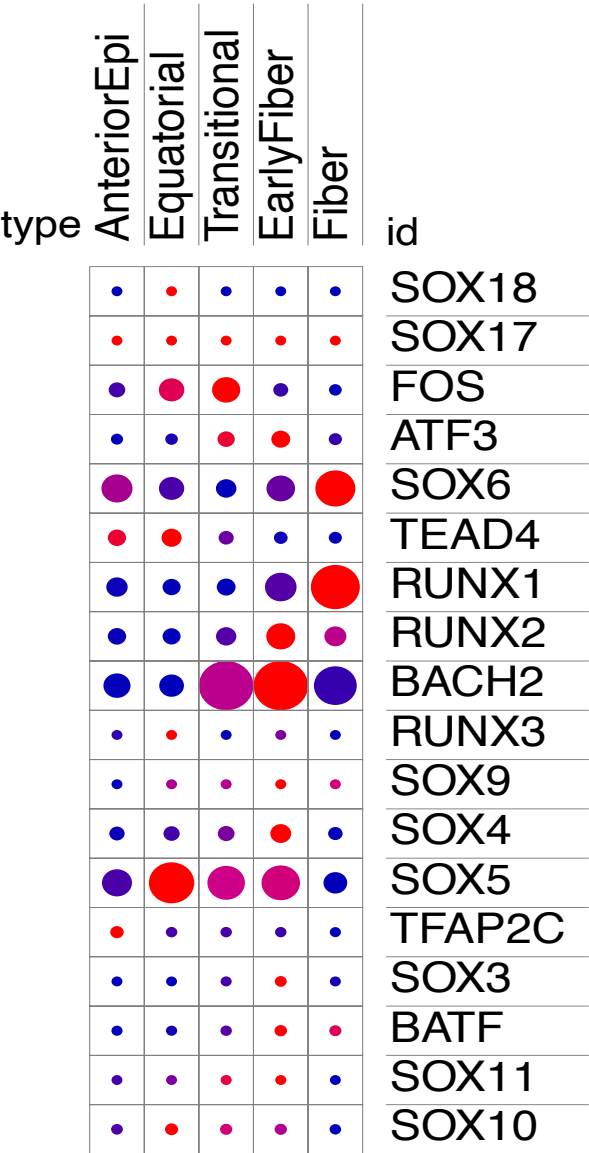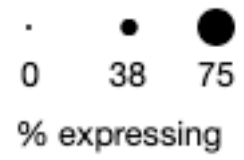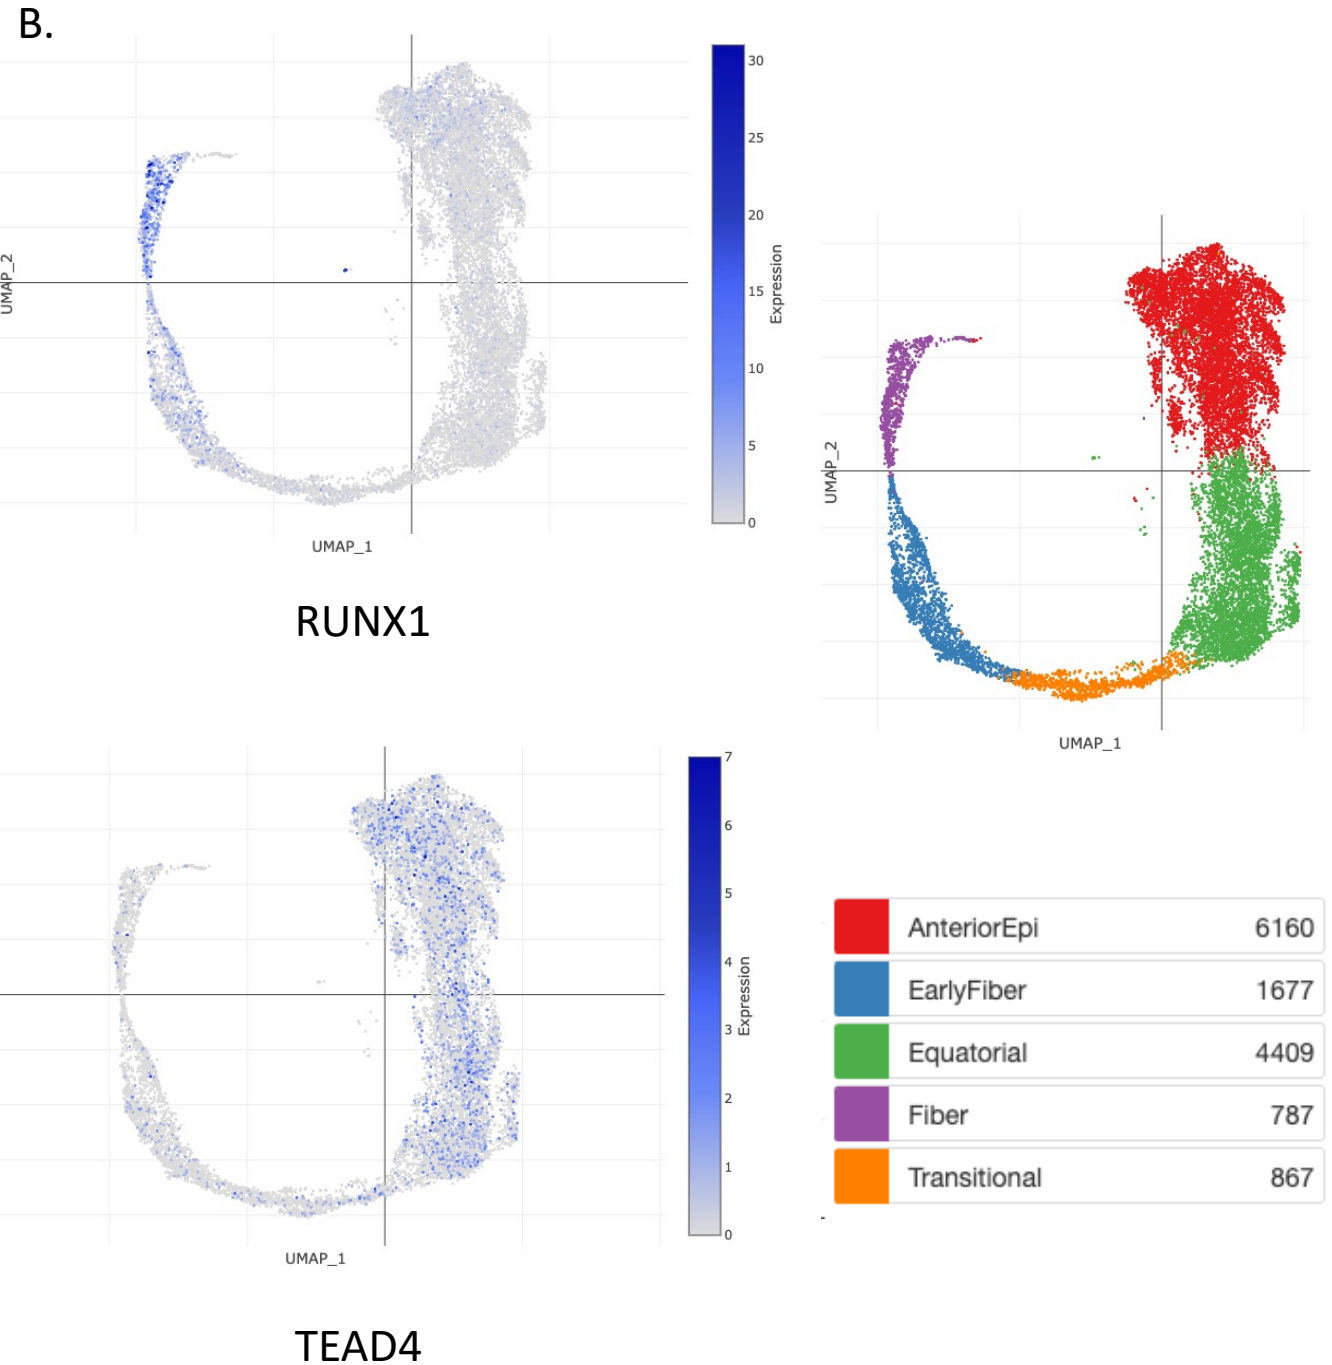

Supplement: s1 [file s1]

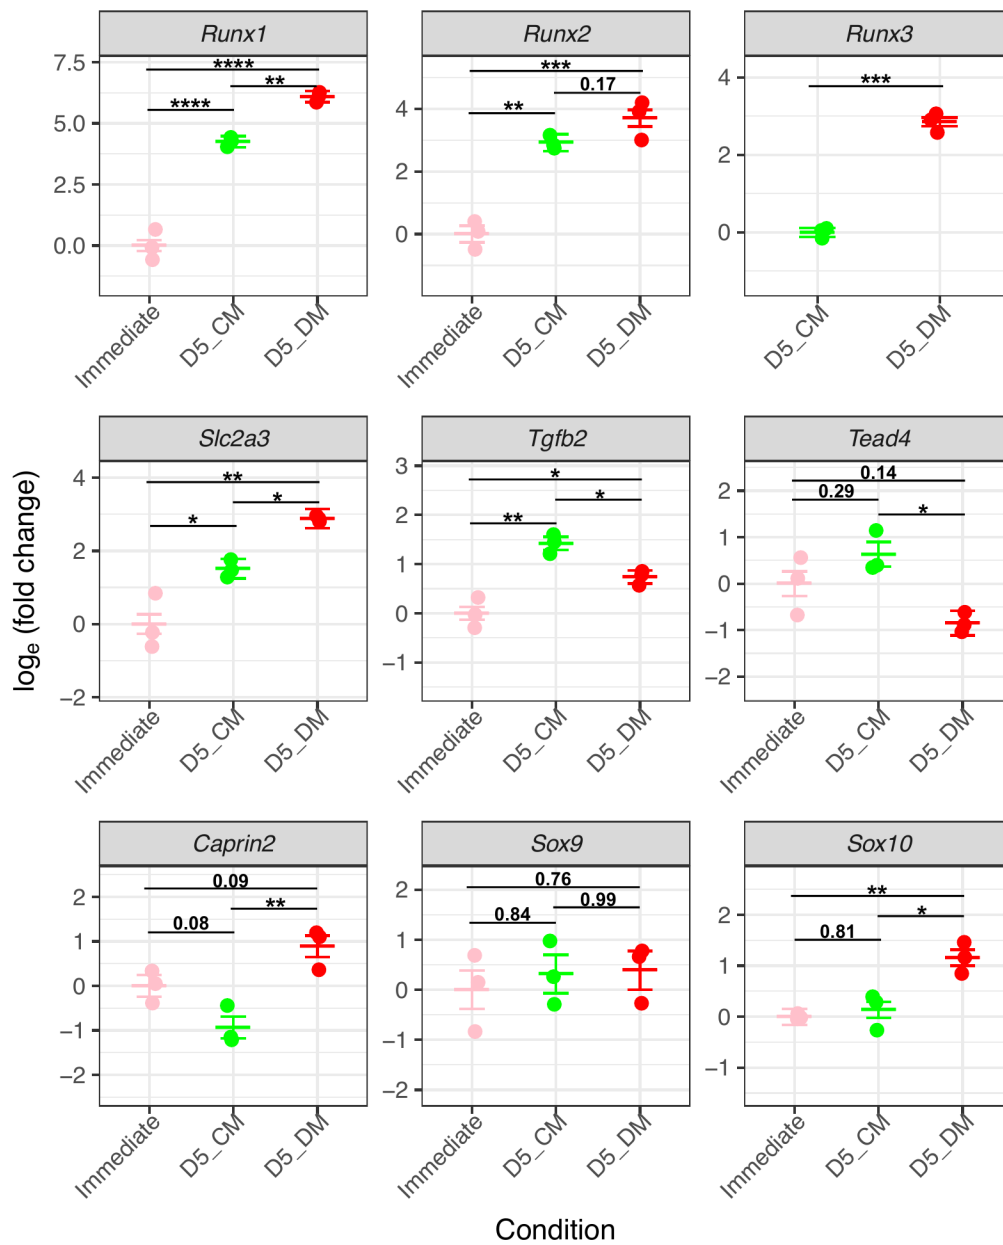

Supplement: s1 [file s1]

Feature Distribution

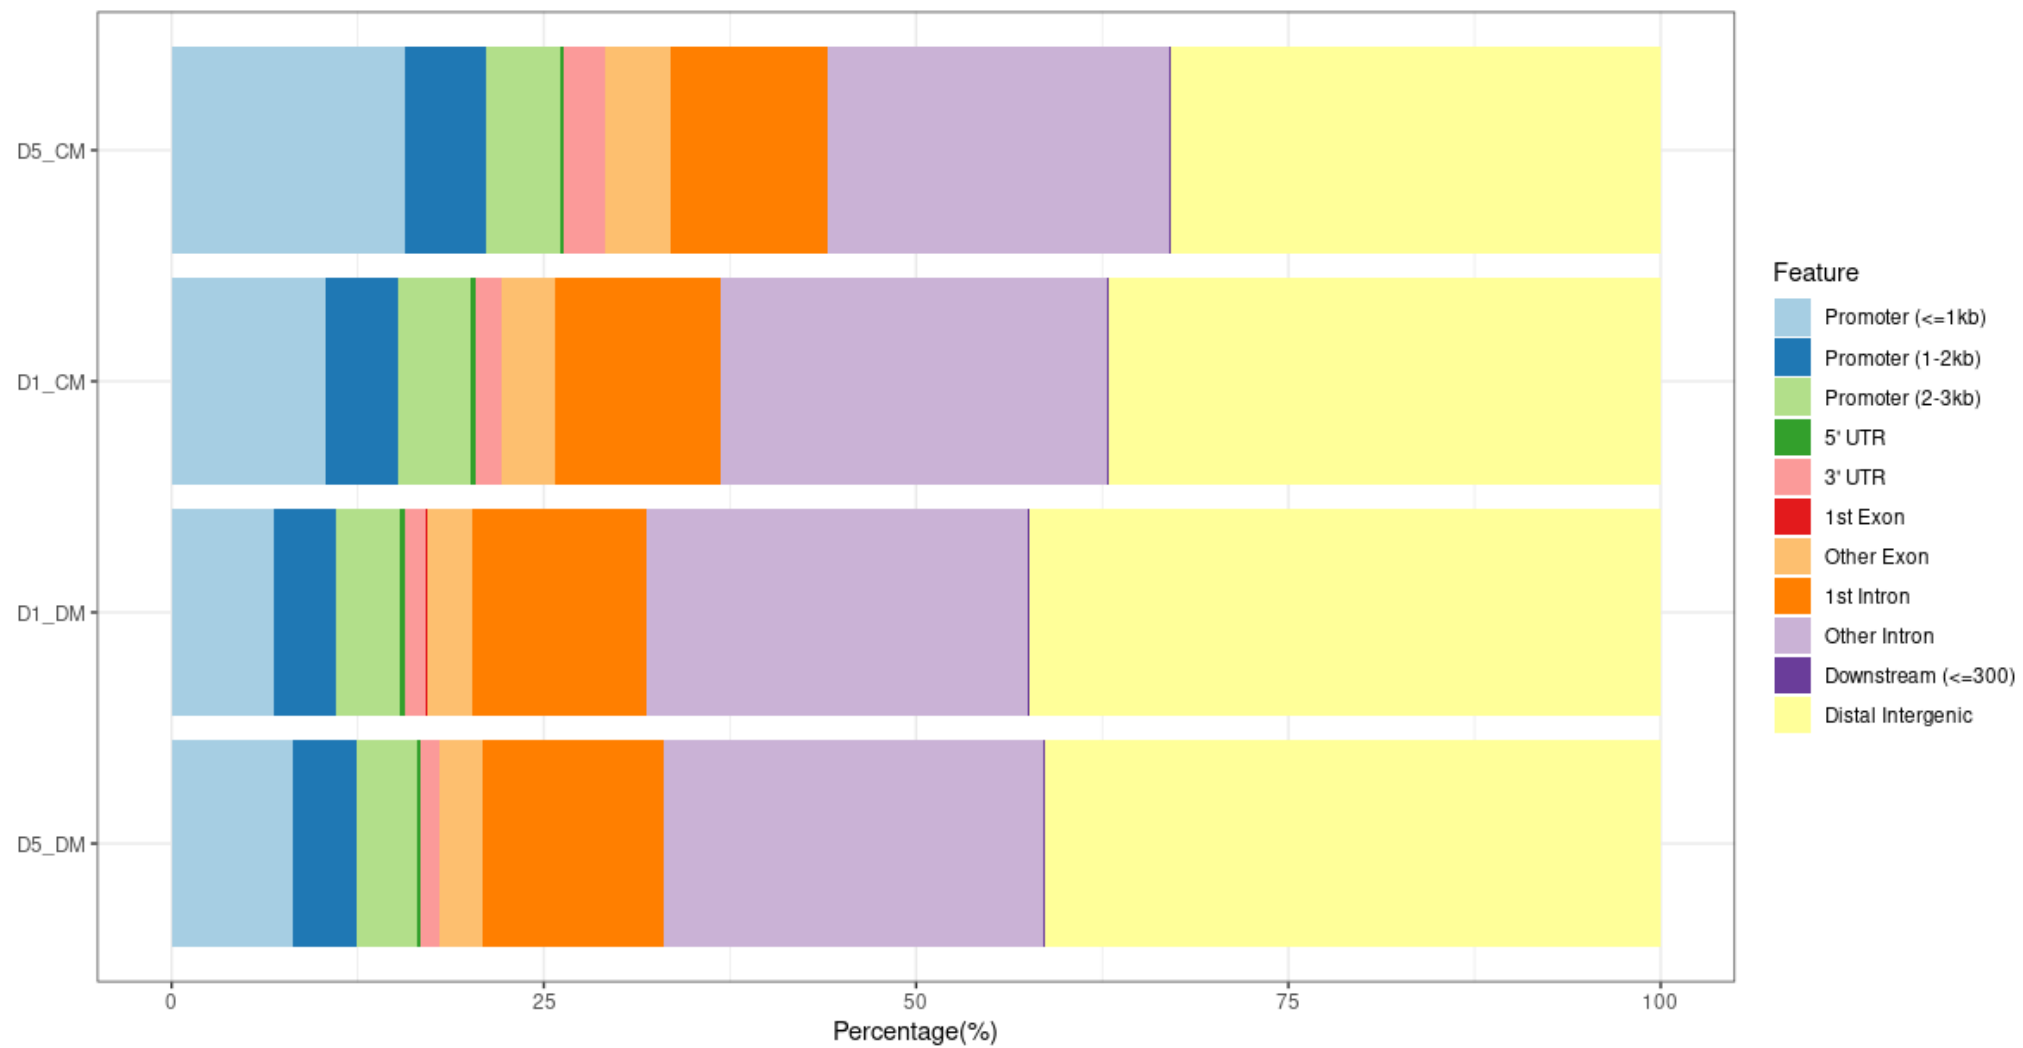

Supplement: s1 [file s1]

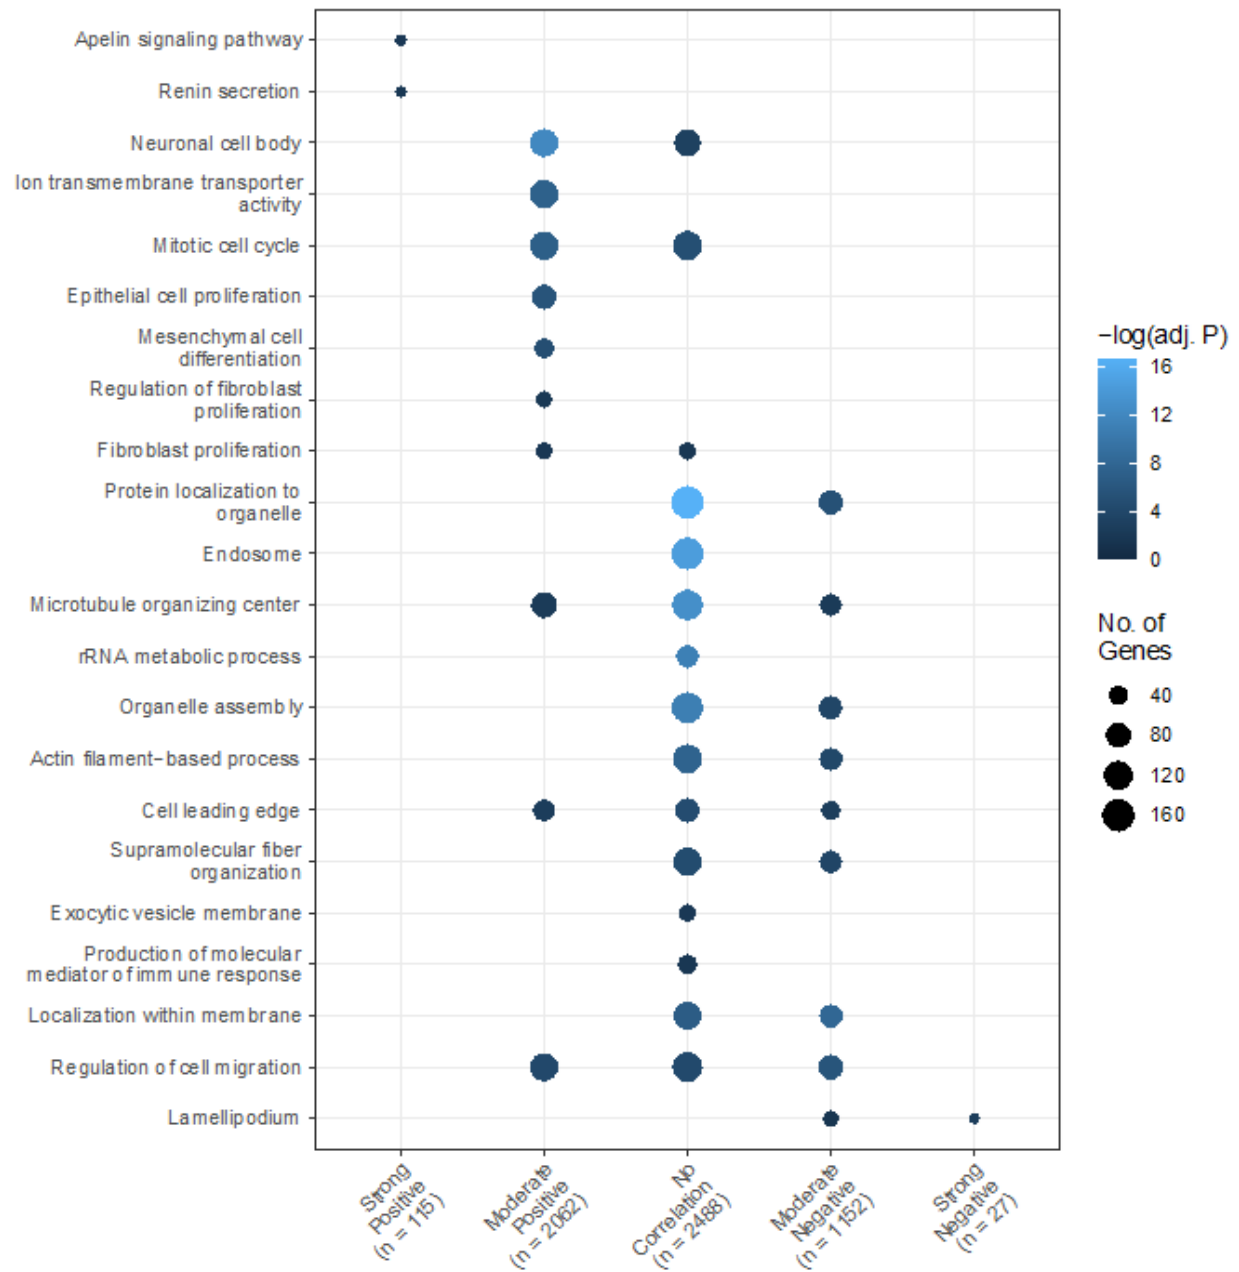

Supplement: s1 [file s1]

## ECM Organization Genes

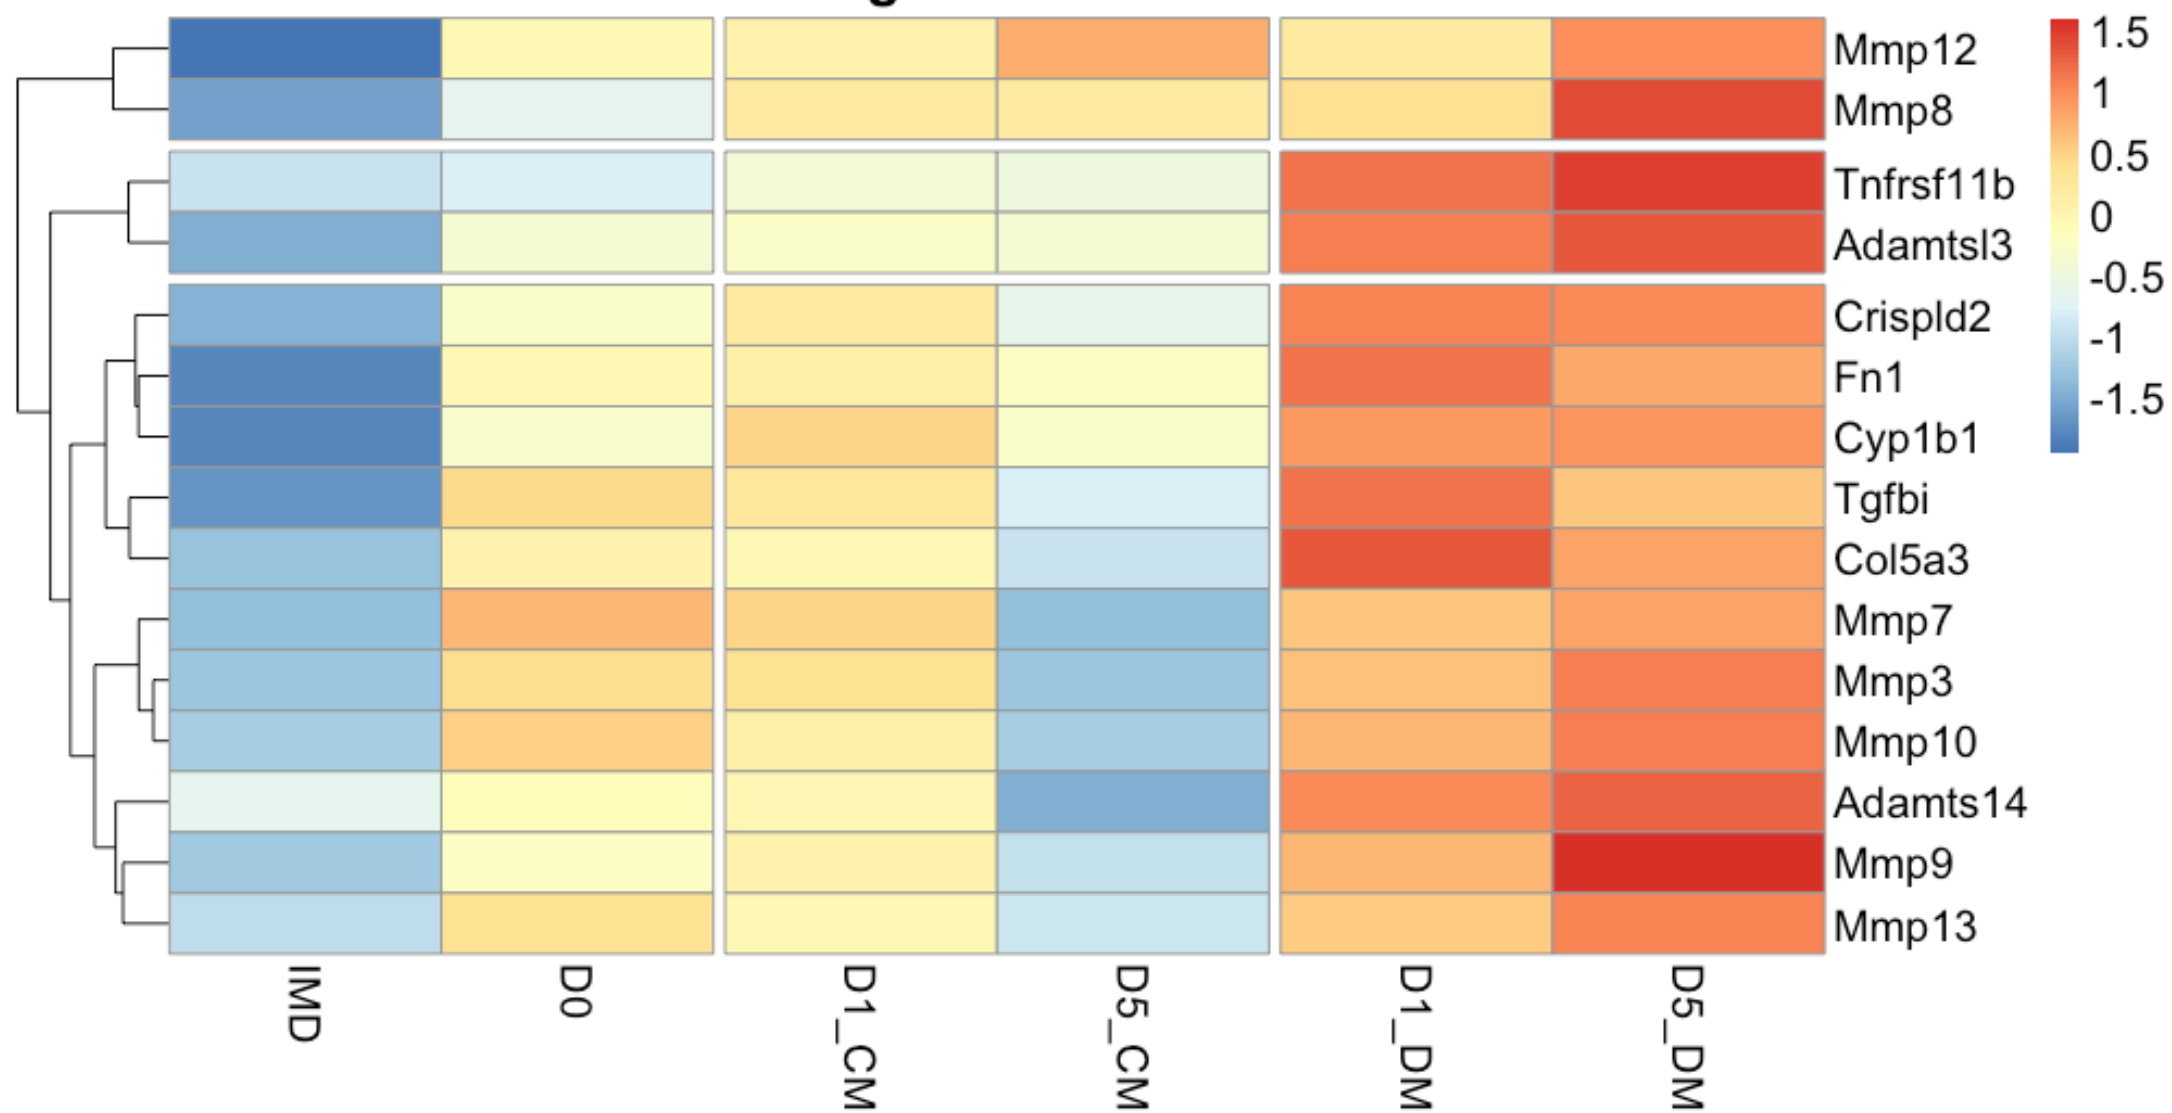

Supplement: s1 [file s1]

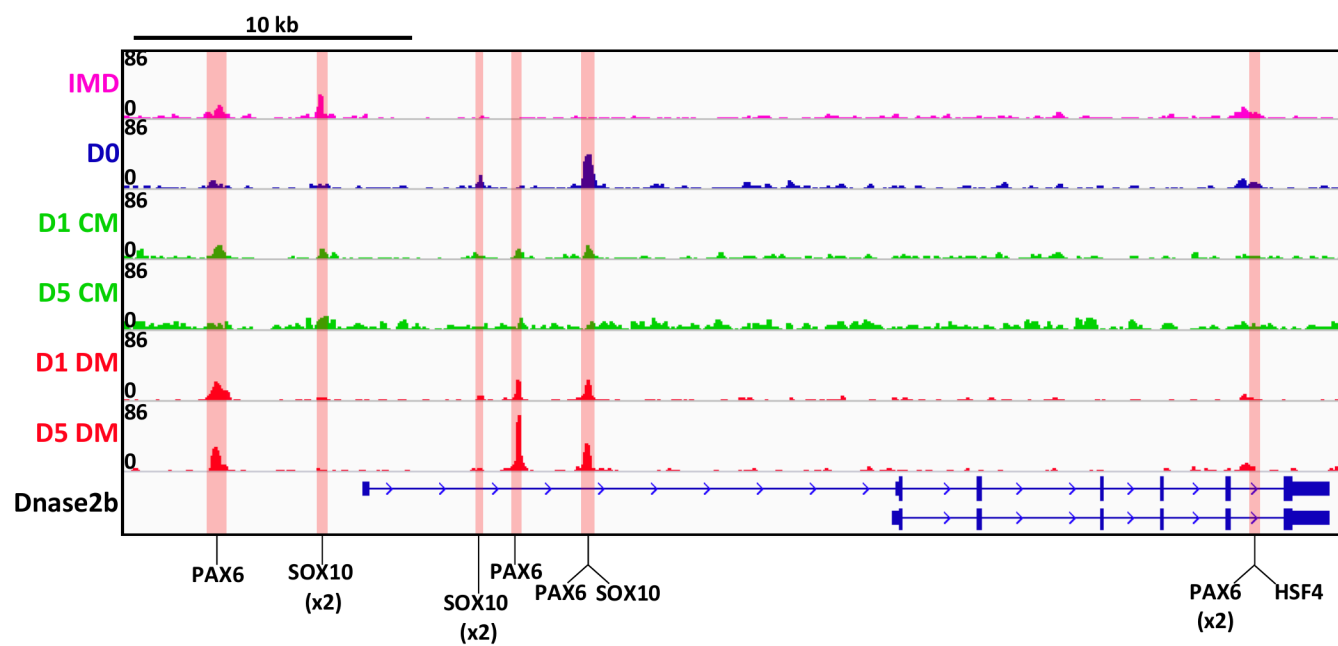

Supplement: s1 [file s1]

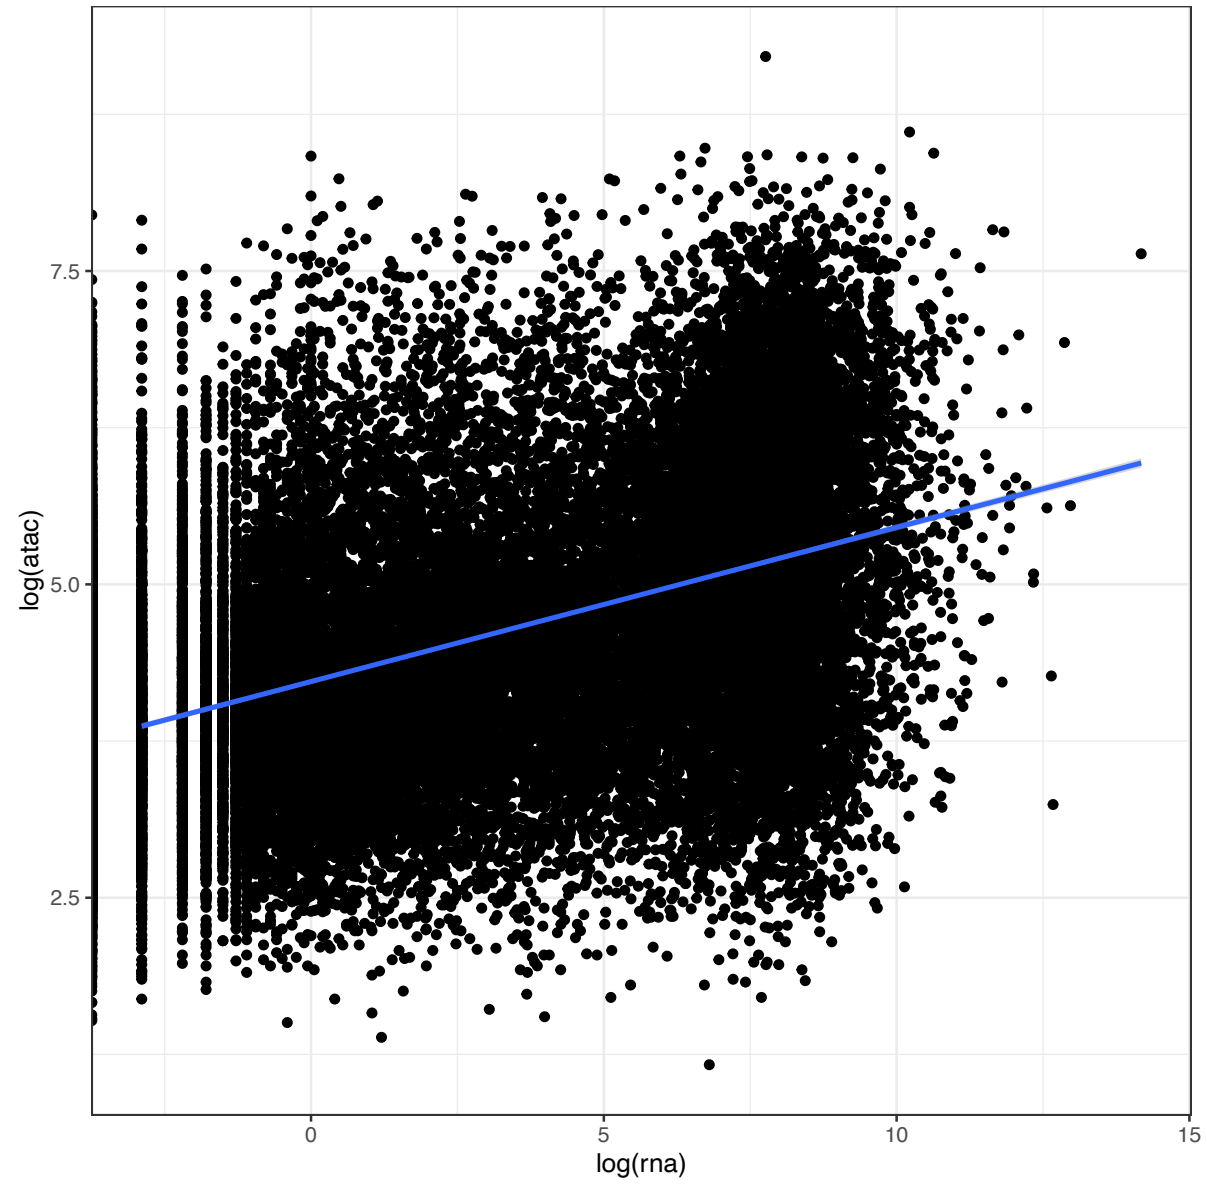

Supplement: s1 [file s1]

A.

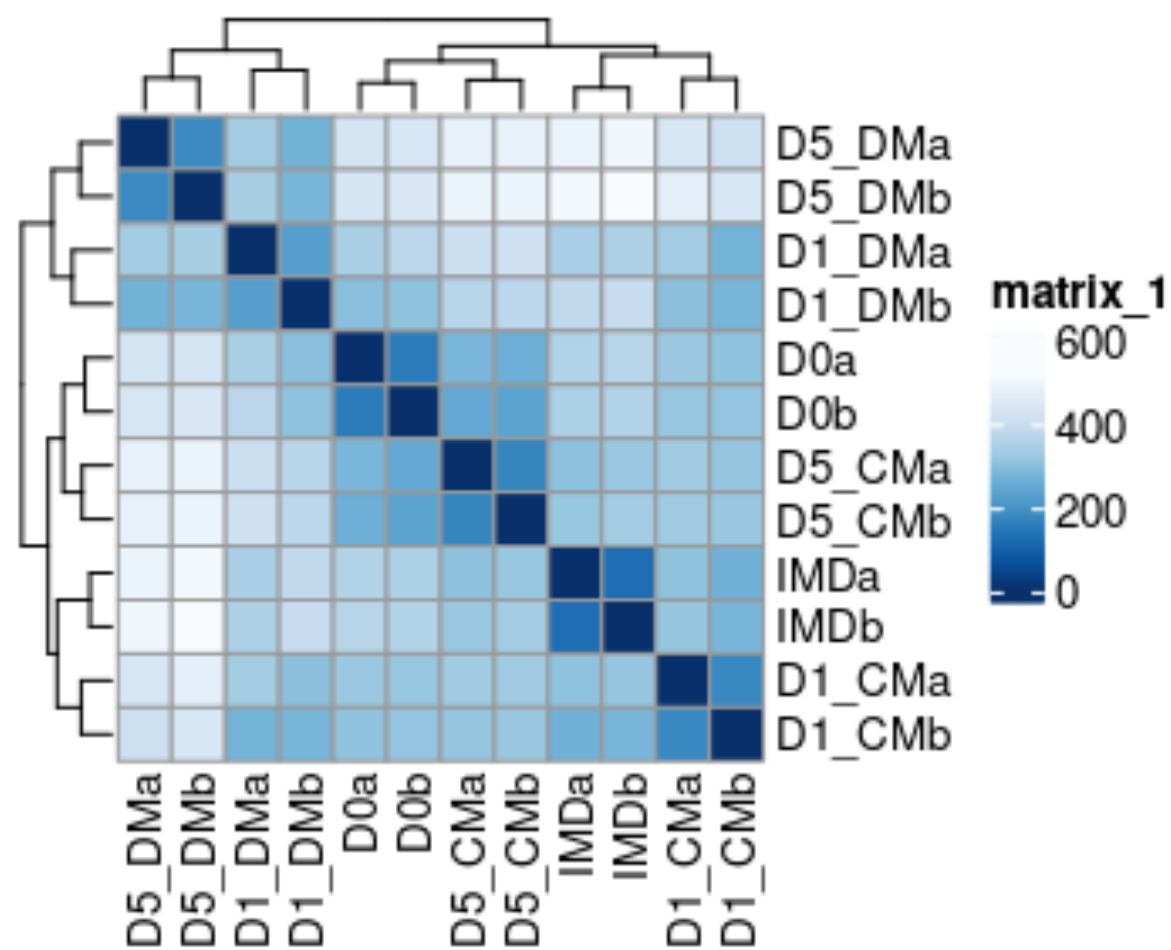

B.

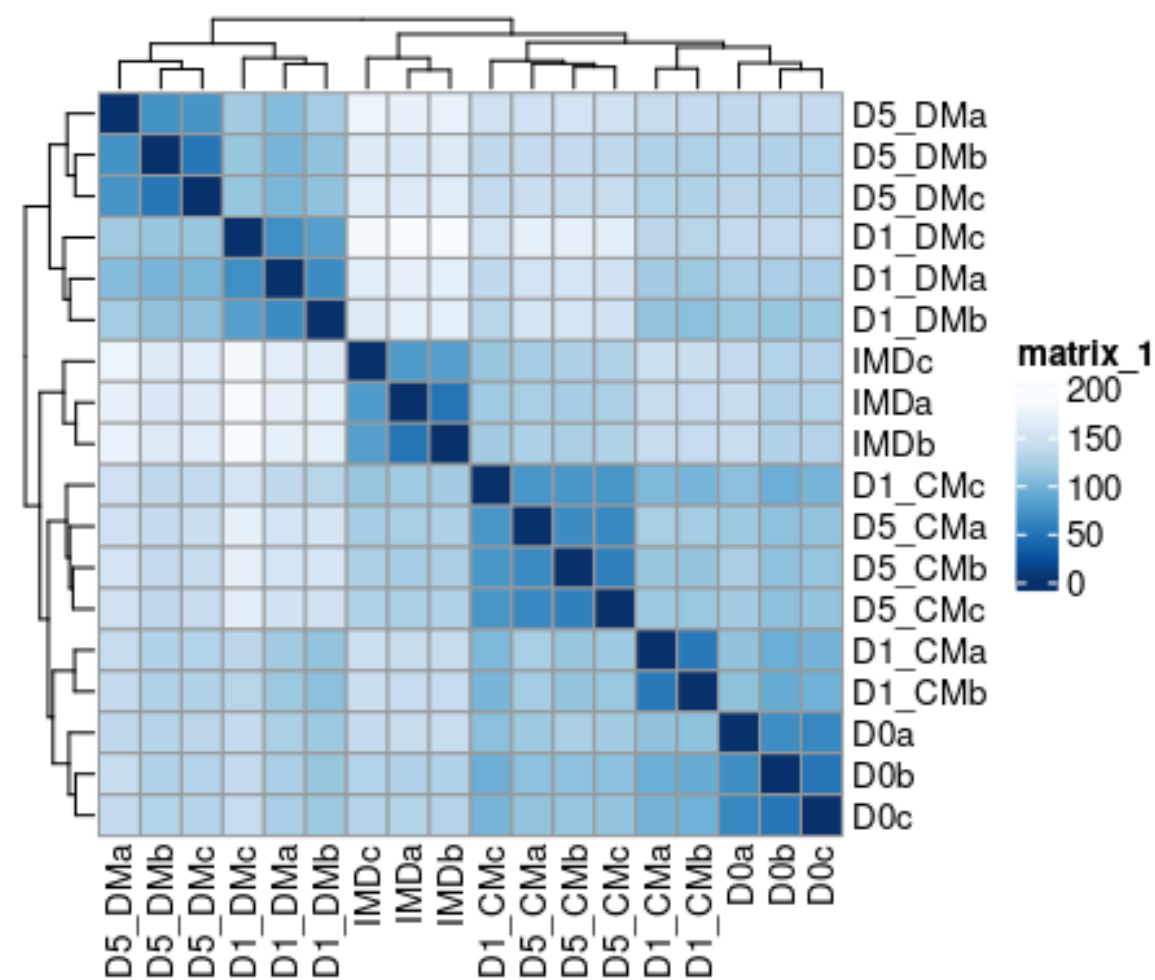

Supplement: s1 [file s1]

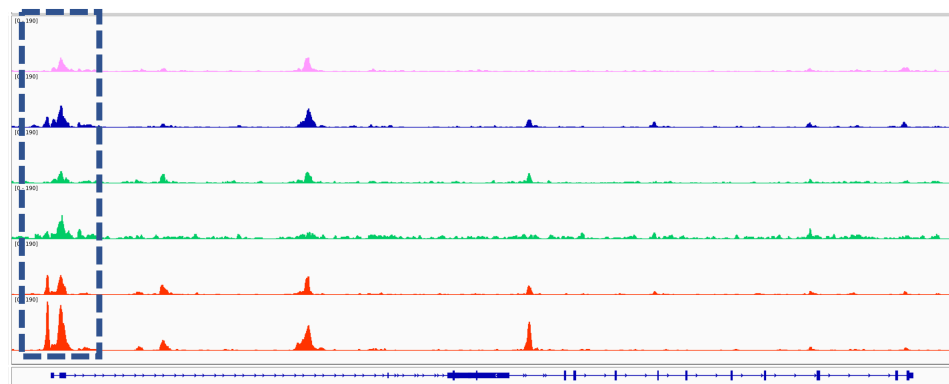

Pla2g7

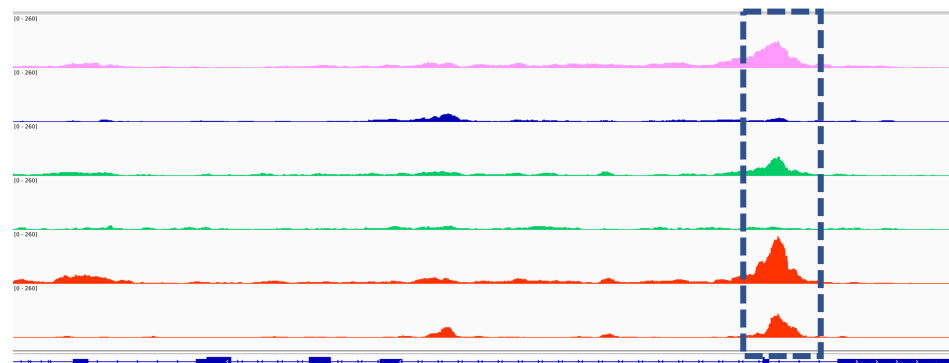

Crygc

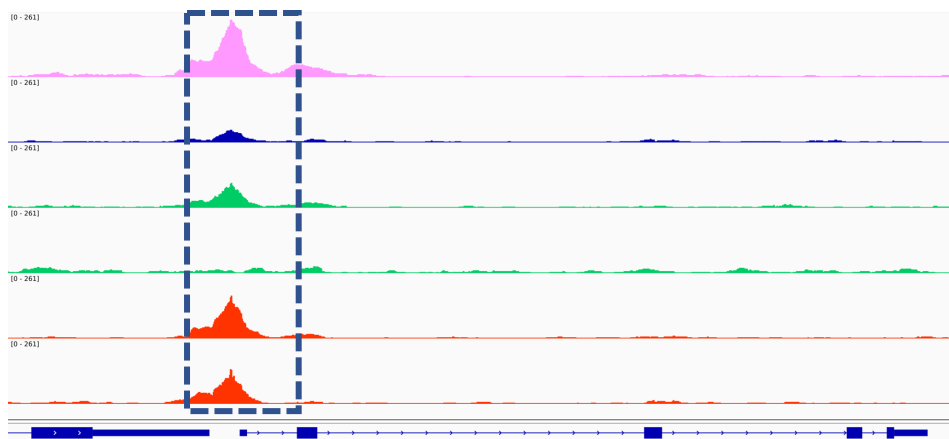

Lim2

IMD  
D0  
D1\_CM  
D5\_CM  
D1\_DM  
D5\_DM

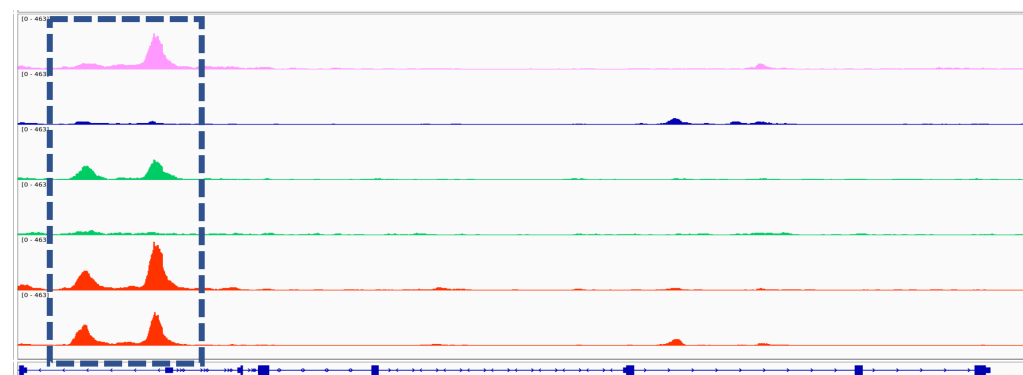

Cryba4/ Crybb1

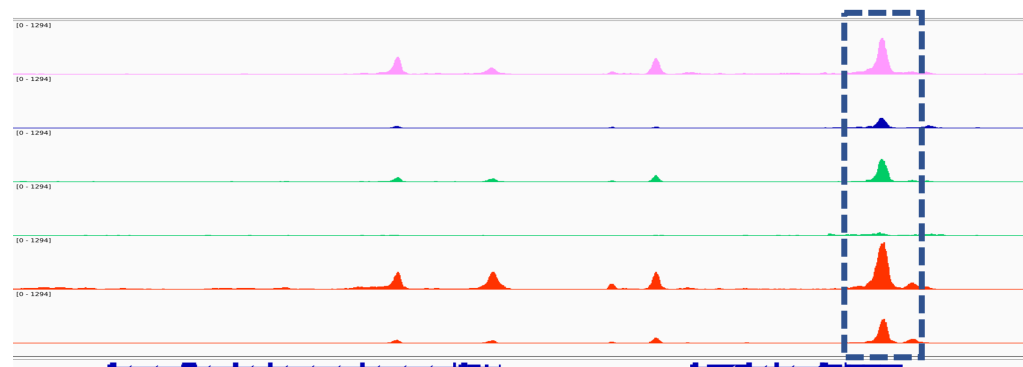

Crybb2/Crybb3

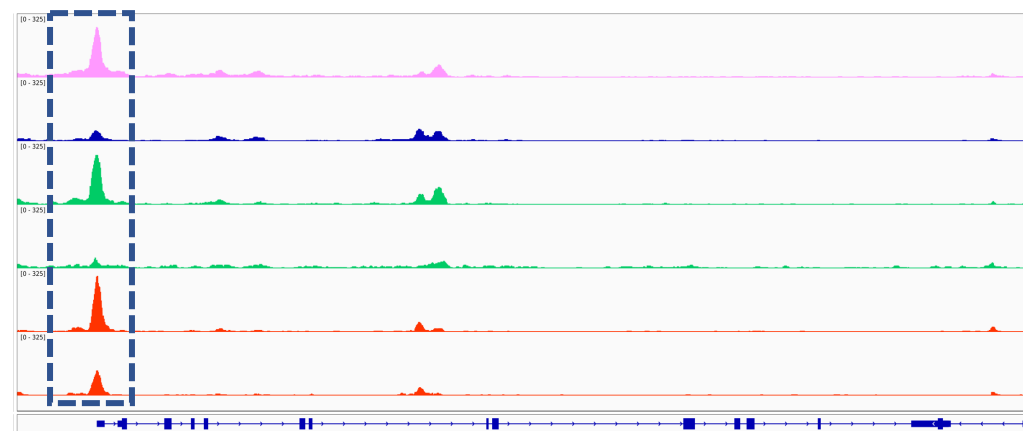

Lct1

IMD  
D0  
D1\_CM  
D5\_CM  
D1\_DM  
D5\_DM

Supplement: s1 [file s1]

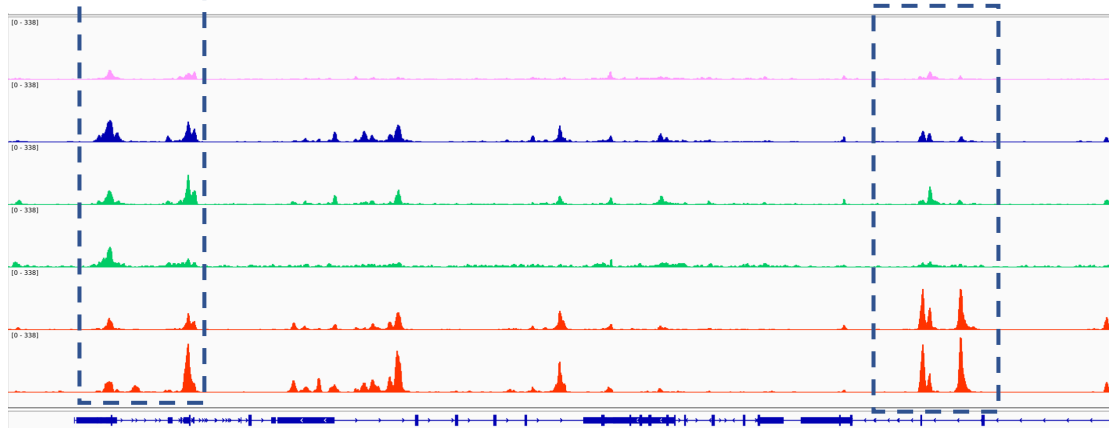

Ampd3

Rnf141

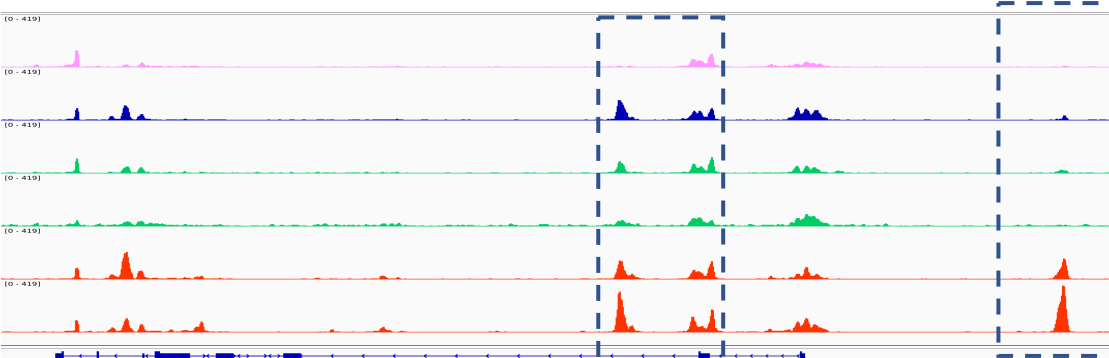

Lmo1

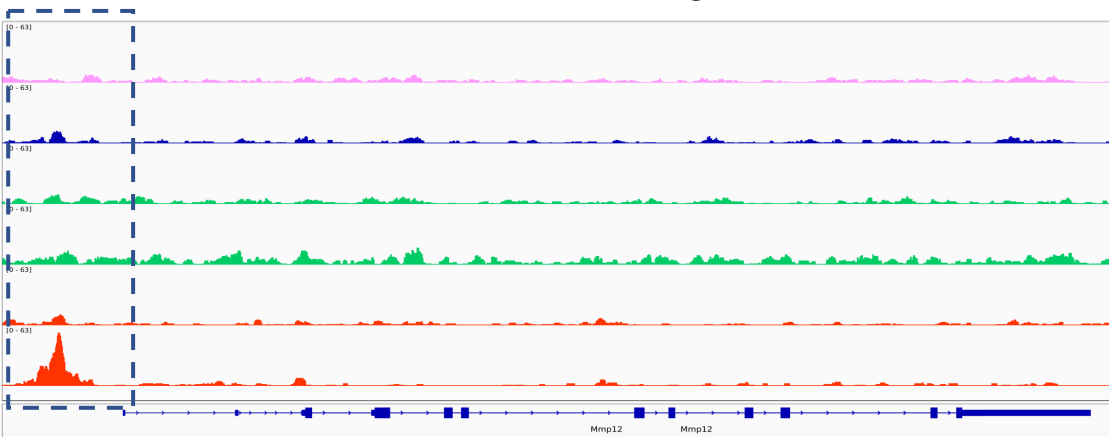

Mmp12

IMD  
D0  
D1\_CM  
D5\_CM  
D1\_DM  
D5\_DM

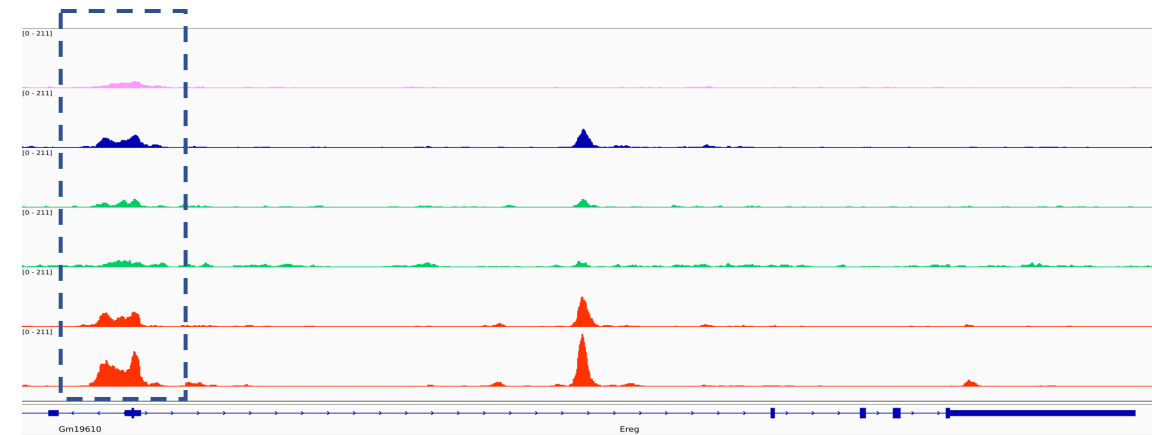

Ereg

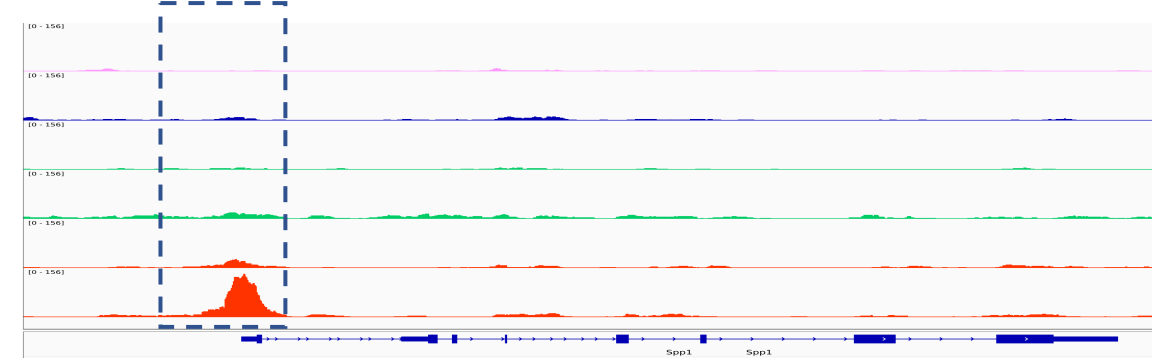

Spp1

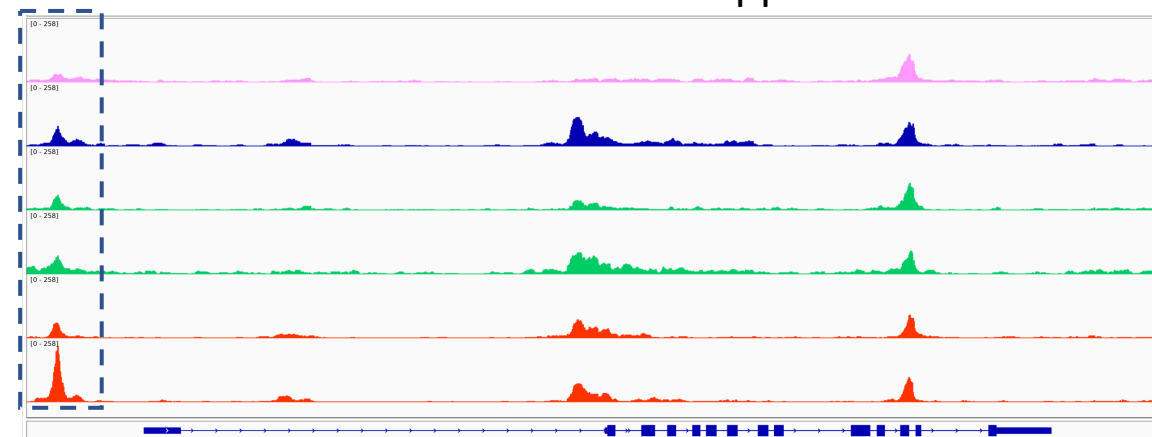

Mmp9

IMD  
D0  
D1\_CM  
D5\_CM  
D1\_DM  
D5\_DM

IMD  
D0  
D1\_CM  
D5\_CM  
D1\_DM  
D5\_DM

Supplement: s1 [file s1]
